# Supplementary material for: An ultrathin and highly efficient interlayer for lithium–sulfur batteries with high sulfur loading and lean electrolyte
Source: Royal Society of Chemistry journal article supplement (doi:10.1039/d1ta10444f), 2022-01-01
Supplement: d1ta10444f1.pdf [file d1ta10444f1.pdf]

## Supporting Information

# An ultrathin and highly efficient interlayer for lithium-sulfur batteries with high sulfur loading and lean electrolyte

Xialu Fan,<sup>ab</sup> Yingqi Liu,<sup>c</sup> Junyang Tan,<sup>c</sup> Shan Yang,<sup>ad</sup> Xiaoyin Zhang,<sup>ab</sup> Bilu Liu,<sup>c</sup>  
Huiming Cheng,<sup>ae</sup> Zhenhua Sun<sup>\*ab</sup> and Feng Li<sup>\*abf</sup>

\* Zhenhua Sun, [zhsun@imr.ac.cn](mailto:zhsun@imr.ac.cn); Feng Li, [fli@imr.ac.cn](mailto:fli@imr.ac.cn)

<sup>a</sup>Shenyang National Laboratory for Materials Science, Institute of Metal Research, Chinese Academy of Sciences, Shenyang, 110016, China

<sup>b</sup>School of Materials Science and Engineering, University of Science and Technology of China, Hefei, 230026, China

<sup>c</sup>Shenzhen Geim Graphene Center, Tsinghua-Berkeley Shenzhen Institute & Tsinghua Shenzhen International Graduate School, Tsinghua University, Shenzhen 518055, China

<sup>d</sup>School of Chemical Engineering, Sichuan University, Chengdu 610065, China

<sup>e</sup>Institute of Technology for Carbon Neutrality, Shenzhen Institute of Advanced Technology, Chinese Academy of Sciences, Shenzhen 518055, China

<sup>f</sup>Dalian National Laboratory for Clean Energy, Dalian 116023, China.

### Calculation of IEI ( $H_{mass}, Z_{mass}$ ) in detail:

A normalized “the ratio of areal loading of interlayer to sulfur (I/S)” was proposed and “interlayer efficiency index (IEI)” was obtained by I/S to quantify the efficiency of interlayers at a certain current density. The schematic of a Li-S pouch cell with a multilayer sulfur cathode (double side coating) and lithium anode is shown in Fig. S4a. To simplify the analysis, a simple model with Cu foil, lithium anode, separator, interlayer, sulfur cathode, and Al foil is presented for calculation and discussion (Fig. S4b). In this model, all components in two Li-S pouch cells were supposed to be the same except the UHEI@PP or PP separator. Therefore,  $E$  (gravimetric energy density) can be derived by:

$$E = \frac{U \cdot Y \cdot A \cdot S}{m_{all}} \quad (1)$$

in which  $U$  is simplified as the average voltage of Li-S cells (2.1 V),  $Y$  is the practical specific capacity based on sulfur (mAh g<sup>-1</sup>),  $A$  is the areal sulfur loading with single coating (mg cm<sup>-2</sup>),  $S$  is the area of sulfur cathode (cm<sup>2</sup>),  $m_{all}$  is the total mass of all components (without the interlayer) in Li-S pouch cell (mg),  $E$  is used to represent the energy density (Wh kg<sup>-1</sup>) of a practical cell upon discharge under specified conditions.

According to the Equation (1), the gravimetric energy density of Li-S pouch cell without/with interlayer materials ( $E_{\text{without/with interlayer}}$ ) can be deduced to:

$$E_{\text{without interlayer}} = \frac{U \cdot Y_{\text{without interlayer}} \cdot A \cdot S}{m_{all}} \quad (2)$$

$$E_{\text{with interlayer}} = \frac{U \cdot Y_{\text{with interlayer}} \cdot A \cdot S}{m_{all} + X \cdot S} \quad (3)$$

Here,  $Y_{\text{with interlayer}}$  or  $Y_{\text{without interlayer}}$  is the practical specific capacity based on sulfur (mAh g<sup>-1</sup>) with or without interlayer materials at a certain current density,  $X$  is the areal mass

loading of interlayer materials ( $\text{mg cm}^{-2}$ ). As shown in Table S3, the normalized I/S ratio was obtained by calculating the ratio of areal loading of interlayer and sulfur. I/S was used to normalize the performance divergence with and without an interlayer at a certain current density to obtain IEI. One IEI ( $H_{mass}$ ) calculated from the energy density of pouch cells was obtained as:

$$H_{mass} = \frac{E_{with\ interlayer}}{E_{without\ interlayer} \times I/S} \quad (4)$$

which means the increased ratio of gravimetric energy density by per mass (g) interlayer based on 1 g sulfur in pouch cells. However, not all interlayers reported before were tested in pouch cells. Therefore, IEI ( $Z_{mass}$ ) was proposed to simplify the  $H_{mass}$ .  $Z_{mass}$  was calculated from practical specific capacity of coin cells as:

$$Z_{mass} = \frac{Y_{with\ interlayer}}{Y_{without\ interlayer} \times I/S} \quad (5)$$

which means the increased ratio of practical specific capacity promoted by per mass (g) interlayers based on 1 g sulfur in coin cells. According to Equation (4) and (5):

$$H_{mass} = Z_{mass} \times \left( 1 - \frac{X \cdot S}{m_{all} + X \cdot S} \right) \quad (6)$$

can be obtained. By proposing these factors, a more objective standard to measure the interlayer efficiency in this field was provided. Meanwhile, similar deduction methods can be used to evaluate the efficiency of other non-active components in Li-S batteries.

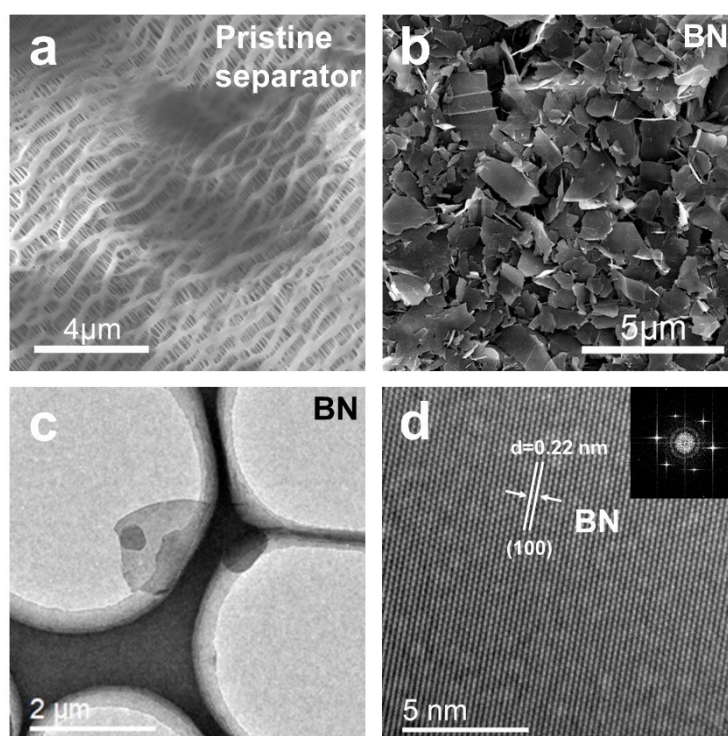

**Fig. S1** SEM images of (a) pristine separator and (b) BN nanosheet. (c) TEM image of BN nanosheet. (d) HRTEM image of BN nanosheet.

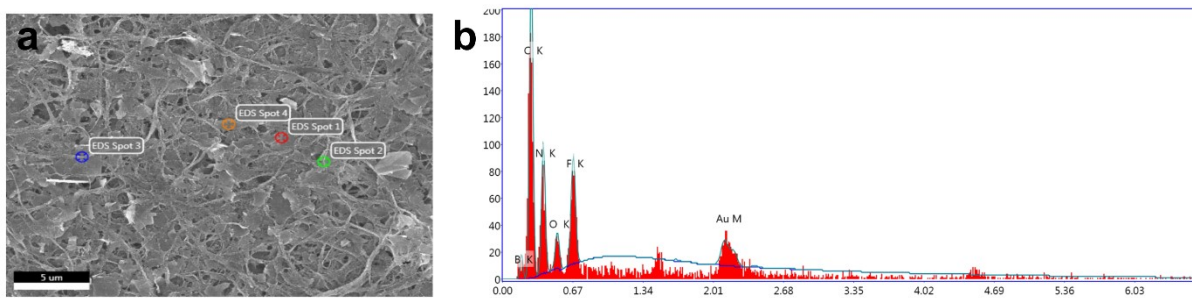

**Fig. S2** (a) SEM image and (b) Corresponding EDS of UHEI.

The corresponding EDS of UHEI (Fig. S2a-b) shows the distributions of B, C, N, O, F and Au elements. The F element comes from the binder of SWCNT solution. Au comes from the metal spraying before conducting the SEM image.

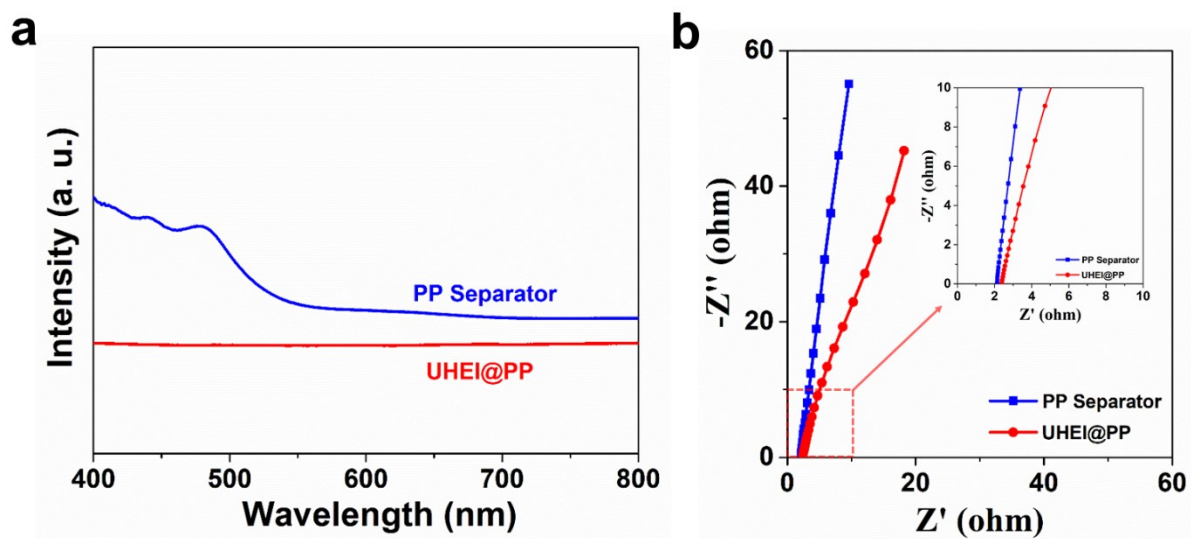

**Fig. S3** (a) UV-Vis spectra of electrolyte in right chamber of H-shape device after 48

h. (b) Electrochemical impedance spectra estimating lithium conductivity.

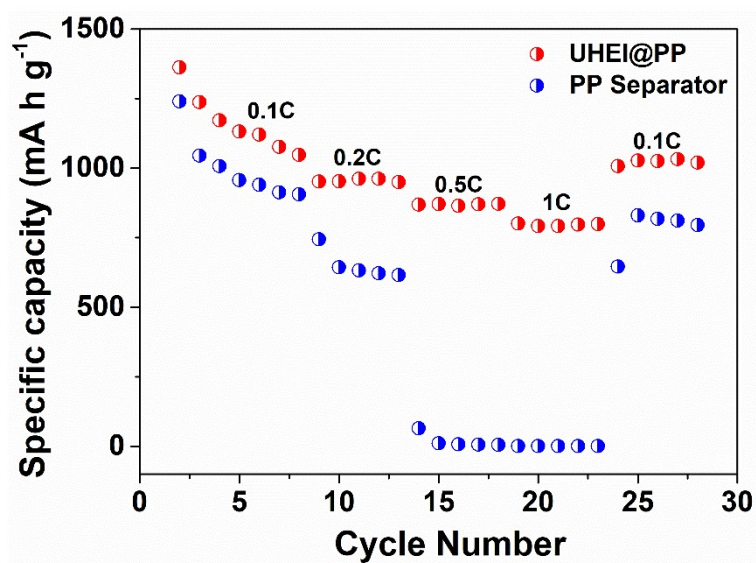

**Fig. S4** Rate performances of Li-S batteries with UHEI@PP and PP separators.

The rate performance tests of Li-S coin cells with UHEI@PP and PP separators are provided in Fig. S4. When the rate was increased to 0.2, 0.5, 1 C, the capacities with UHEI@PP decreased to 961.5 mA h g<sup>-1</sup>, 864.3 mA h g<sup>-1</sup>, and 792.1 mA h g<sup>-1</sup>, respectively and an extremely stable discharge capacity of 1025.2 mA h g<sup>-1</sup> was recovered when restored to 0.1 C. On the other hand, Li-S batteries with the PP separator showed poor high-rate capability, and only 817.6 mA h g<sup>-1</sup> was recovered when restored to 0.1 C. Sulfur cathodes for rate performance tests were fabricated as follows. First, CMK-3 powder (XFP03, XFNANO) and sulfur powder with a mass ratio of 4:6 were mixed in a Teflon container and heated to 155 °C for 12 h to obtain CMK-3/S. Second, the CMK-3/S, SP and polyvinylidene fluoride (PVDF) binder with a mass ratio of 7:2:1 was dispersed in N-methyl-2-pyrrolidone (NMP) to form a slurry. Finally, the slurry was coated onto a carbon-coated Al foil and dried in a vacuum oven at 60 °C for 12 h. The active material loading was kept at 1.5-2.0 mg cm<sup>-2</sup>.

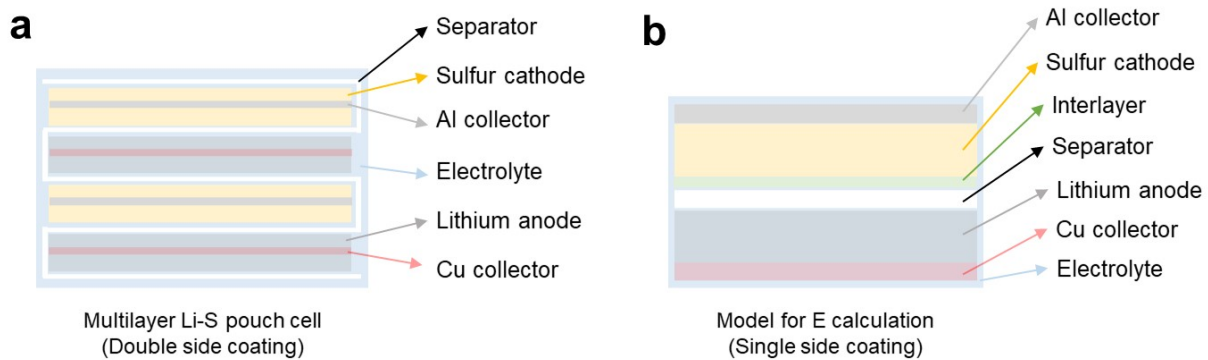

**Fig. S5** The schematic illustration of the cross sectional (a) Multilayer Li-S pouch cell with double side coating. (b) A simplified cell model for calculating E with single side coating.



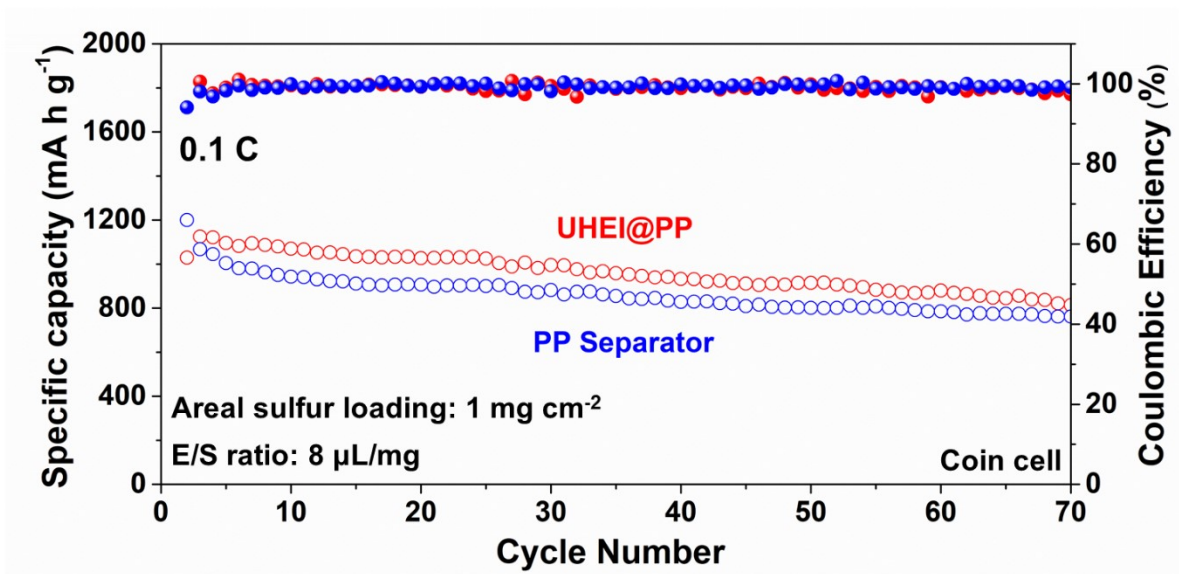

**Fig. S6** Cycling stability and coulombic efficiency of Li-S coin cells with UHEI@PP and PP separator at 0.1 C under lean electrolyte conditions (E/S ratio = 8 μL mg<sup>-1</sup>) for 70 cycles.

**Table S1.** Summary of different electrochemical parameters for Li-S batteries with UHEI@PP and PP separator.

| Parameters                                          | PP separator | UHEI@PP |
|-----------------------------------------------------|--------------|---------|
| Li <sup>+</sup> conductivity (mS cm <sup>-1</sup> ) | 0.396        | 0.373   |
| Li <sup>+</sup> transfer number                     | 0.66         | 0.69    |

**Table S2.** Comparison of the UHEI with other interlayers for Li-S batteries.

| Materials                                 | Sulfur loading<br>(mg cm <sup>-2</sup> ) | High plateau ratio | Low plateau ratio | Thickness |
|-------------------------------------------|------------------------------------------|--------------------|-------------------|-----------|
| P/C-C-N-Co <sup>1</sup>                   | 1                                        | 1.74               | 1.58              | 10 μm     |
| CGF <sup>2</sup>                          | 1.2                                      | 1.67               | 1.23              | 30 μm     |
|                                           | 5.3                                      | 0.82               | 4.06              |           |
| NCM <sup>3</sup>                          | 1.5                                      | 0.97               | 1.32              | 10 μm     |
|                                           | 4                                        | 1.27               | 1.56              |           |
| ZnHMT <sup>4</sup>                        | 4.5                                      | 1.33               | 1.31              | 1 nm      |
| μFGF-MoS <sub>2</sub> /C-TiN <sup>5</sup> | 2.5                                      | 1.6                | 3.02              | 30 μm     |
| ZnS/NCNS <sup>6</sup>                     | 1.5                                      | 1.32               | 1.3               | No data   |
| TiB <sub>2</sub> @G <sup>7</sup>          | 1.5                                      | 1.58               | 1.73              | 12.5 μm   |
| PZI <sup>8</sup>                          | 2.2                                      | 0.98               | 1.01              | 0.2 μm    |
|                                           | 4.5                                      | 1                  | 1.04              |           |
|                                           | 5.8                                      | 1.02               | 1.06              |           |
| UHEI*                                     | 2                                        | 1.32               | 1.53              | 0.86 μm   |
|                                           | 5                                        | 1.83               | 2.08              |           |
|                                           | 10                                       | 16.95              | 2.91              |           |

\*: this work

**Table S3.** Comparison of the UHEI with other interlayers for Li-S batteries.

| Materials                                         | Sulfur loading<br>(mg cm <sup>-2</sup> ) | Interlayer loading<br>(mg cm <sup>-2</sup> ) | Interlayer<br>thickness (μm) | I/S  | Z <sub>mass</sub><br>(100 cycles) |
|---------------------------------------------------|------------------------------------------|----------------------------------------------|------------------------------|------|-----------------------------------|
| CGF <sup>2</sup>                                  | 1.2                                      | 0.3                                          | 30                           | 0.25 | 5.52 (0.2 C)                      |
| NCM <sup>3</sup>                                  | 1.5                                      | 0.9                                          | 10                           | 0.60 | 3.15 (0.2 C)                      |
| ZnHMT <sup>4</sup>                                | 4.5                                      | 0.5                                          | 10                           | 0.11 | 10.60 (0.1 C)                     |
| AS PC-Sn <sub>4</sub> P <sub>3</sub> <sup>9</sup> | 1                                        | 0.15                                         | 4                            | 0.15 | 9.18 (0.2 C)                      |
| HC-PDDA <sup>10</sup>                             | 1.2                                      | 0.30                                         | 15                           | 0.25 | 7.29 (0.2 C)                      |
| PPZ-HG-CCP <sup>11</sup>                          | 1.5                                      | 3.1                                          | 50                           | 2.07 | 0.62 (0.2 C)                      |
| PM (0.4 M)-CNT <sup>12</sup>                      | 0.9                                      | 0.16                                         | 4                            | 0.18 | 7.91 (0.2 C)                      |
| UHEI*                                             | 4.1                                      | 0.17                                         | 0.86                         | 0.04 | 182.30 (0.2 C)                    |

\*: this work

## References

- 1 Y. Li, P. Zhou, H. Li, T. Gao, L. Zhou, Y. Zhang, N. Xiao, Z. Xia, L. Wang, Q. Zhang, L. Gu and S. Guo, *Small Methods*, 2020, **4**, 1900701.
- 2 H. J. Peng, D. W. Wang, J. Q. Huang, X. B. Cheng, Z. Yuan, F. Wei and Q. Zhang, *Adv. Sci.*, 2016, **3**, 1500268.
- 3 W. L. Cai, G. R. Li, K. L. Zhang, G. N. Xiao, C. Wang, K. F. Ye, Z. W. Chen, Y. C. Zhu and Y. T. Qian, *Adv. Funct. Mater.*, 2018, **28**, 11.
- 4 X. Dou, G. Li, W. Zhang, F. Lu, D. Luo, W. Liu, A. Yu and Z. Chen, *J. Mater. Chem. A*, 2020, **8**, 5062-5069.
- 5 M. Waqas, Y. Han, D. Chen, S. Ali, C. Zhen, C. Feng, B. Yuan, J. Han and W. He, *Energy Storage Mater.*, 2020, **27**, 333-341.
- 6 Z. Li, F. Zhang, L. Tang, Y. Tao, H. Chen, X. Pu, Q. Xu, H. Liu, Y. Wang and Y. Xia, *Chem. Eng. J.*, 2020, **390**, 124653.
- 7 L. Jin, J. Ni, C. Shen, F. Peng, Q. Wu, D. Ye, J. Zheng, G. Li, C. Zhang, Z. Li and J. P. Zheng, *J. Power Sources*, 2020, **448**, 227336.
- 8 G. Li, F. Lu, X. Dou, X. Wang, D. Luo, H. Sun, A. Yu and Z. Chen, *J. Am. Chem. Soc.*, 2020, **142**, 3583-3592.
- 9 Z. Ye, Y. Jiang, T. Feng, Z. Wang, L. Li, F. Wu and R. Chen, *Nano Energy*, 2020, **70**, 104532.
- 10 H. Gao, S. Ning, J. Lin and X. Kang, *Energy Storage Mater.*, 2021, **40**, 312-319.
- 11 P. Chen, Z. Wu, T. Guo, Y. Zhou, M. Liu, X. Xia, J. Sun, L. Lu, X. Ouyang, X. Wang, Y. Fu and J. Zhu, *Adv. Mater.*, 2021, **33**, 2007549.
- 12 D. Xiong, S. Huang, D. Fang, D. Yan, G. Li, Y. Yan, S. Chen, Y. Liu, X. Li, Y. Von Lim, Y. Wang, B. Tian, Y. Shi and H. Y. Yang, *Small*, 2021, **17**, 2007442.
